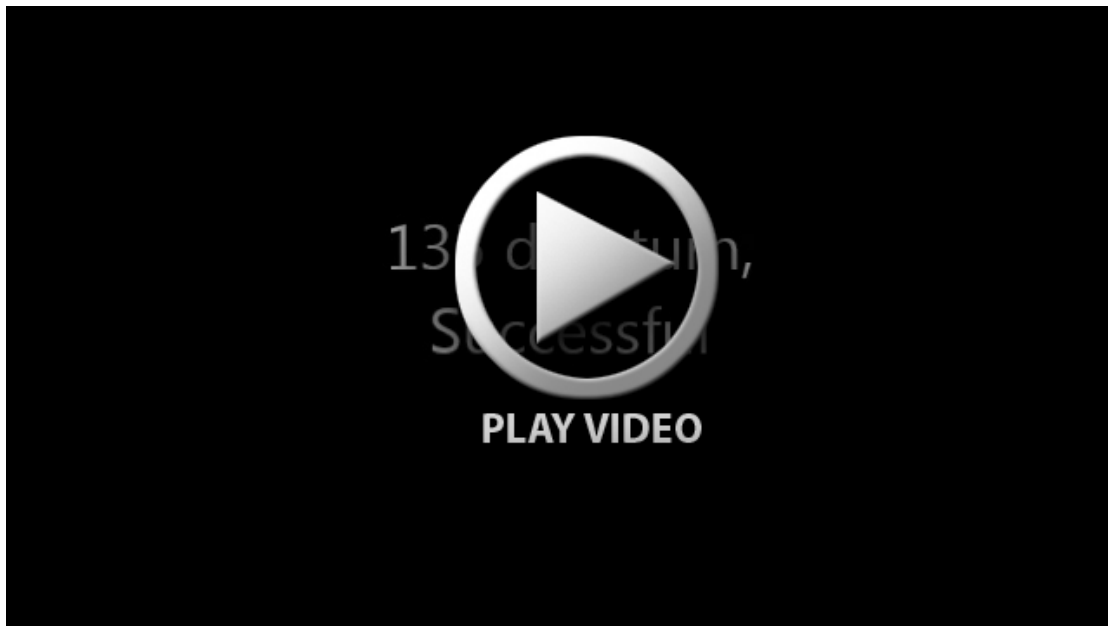

**Movie 1.** A successful run through a 135 deg racetrack followed by a crash on the 135 deg track for the northern quoll.

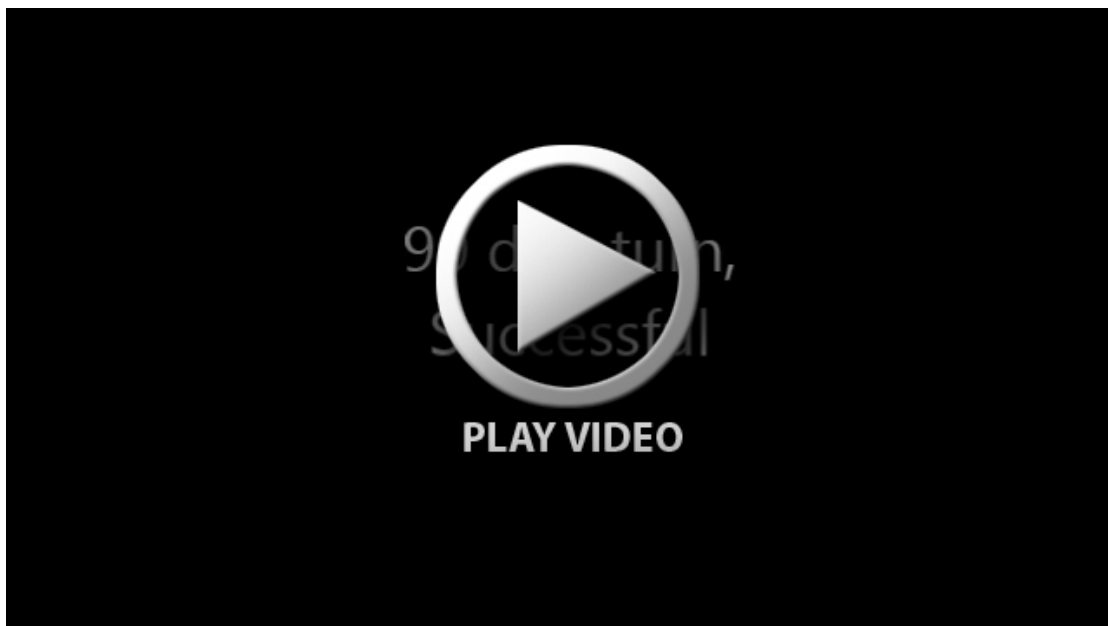

**Movie 2.** A successful run through a 90 deg racetrack followed by a crash on the 90 deg track for the northern quoll.
